# Supplementary material
Source: Springer Nature journal article supplement (https://www.springermedizin.de/resource/supplementary/12936_2011_1946_MOESM7_ESM.pdf/9542110)

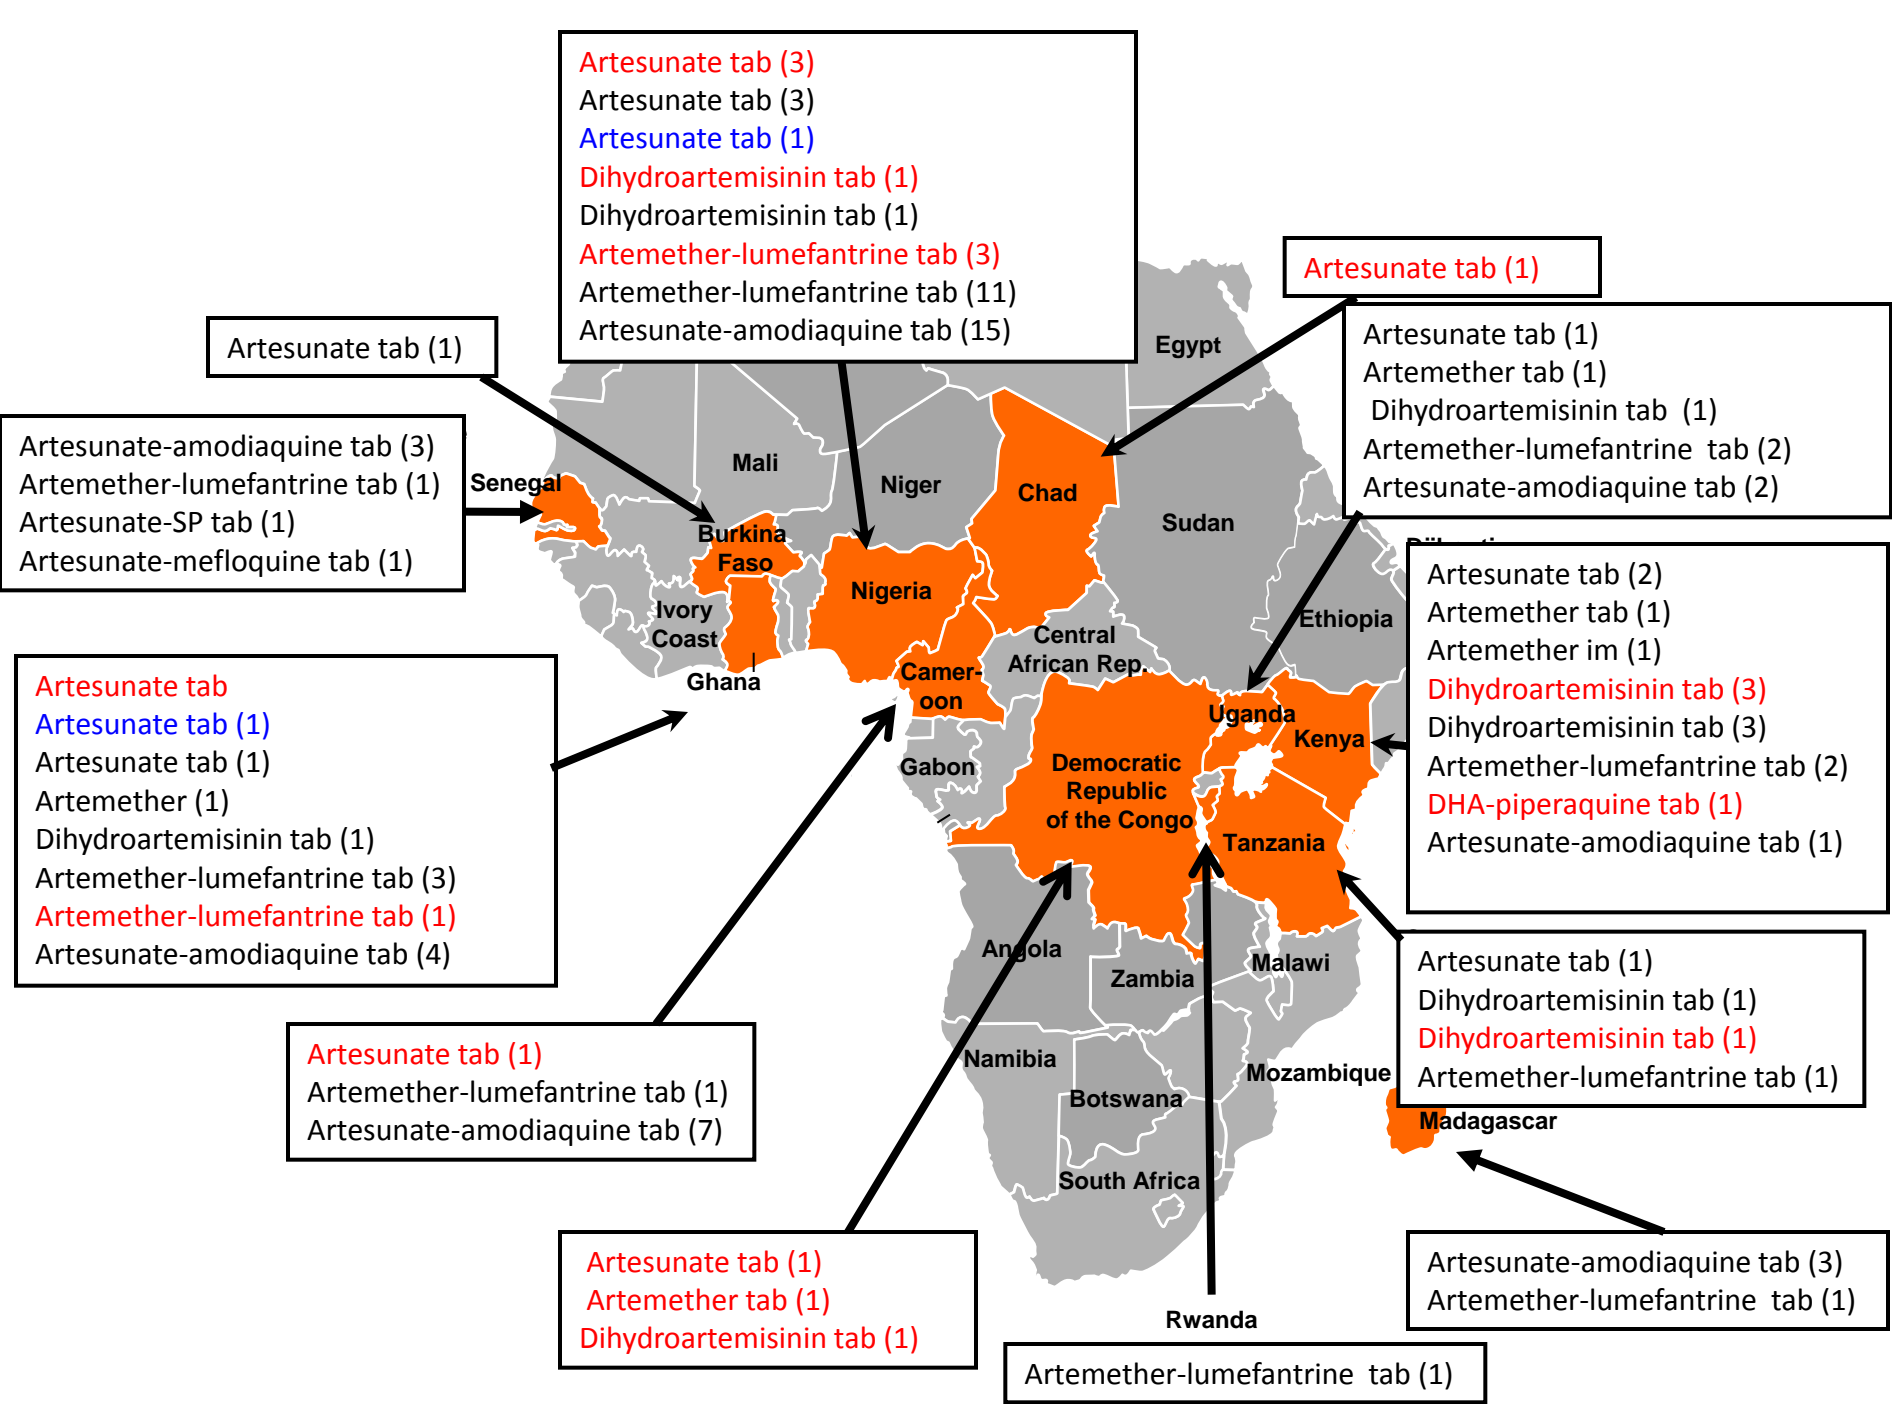

Supplement: MOESM7 [file 9542110]
